# Supplementary material for: Fast skeletal muscle transcriptome of the Gilthead sea bream (Sparus aurata) determined by next generation sequencing
Source: PubMed Central journal article supplement (PMC3418159; doi:10.1186/1471-2164-13-181), 2012-05-11

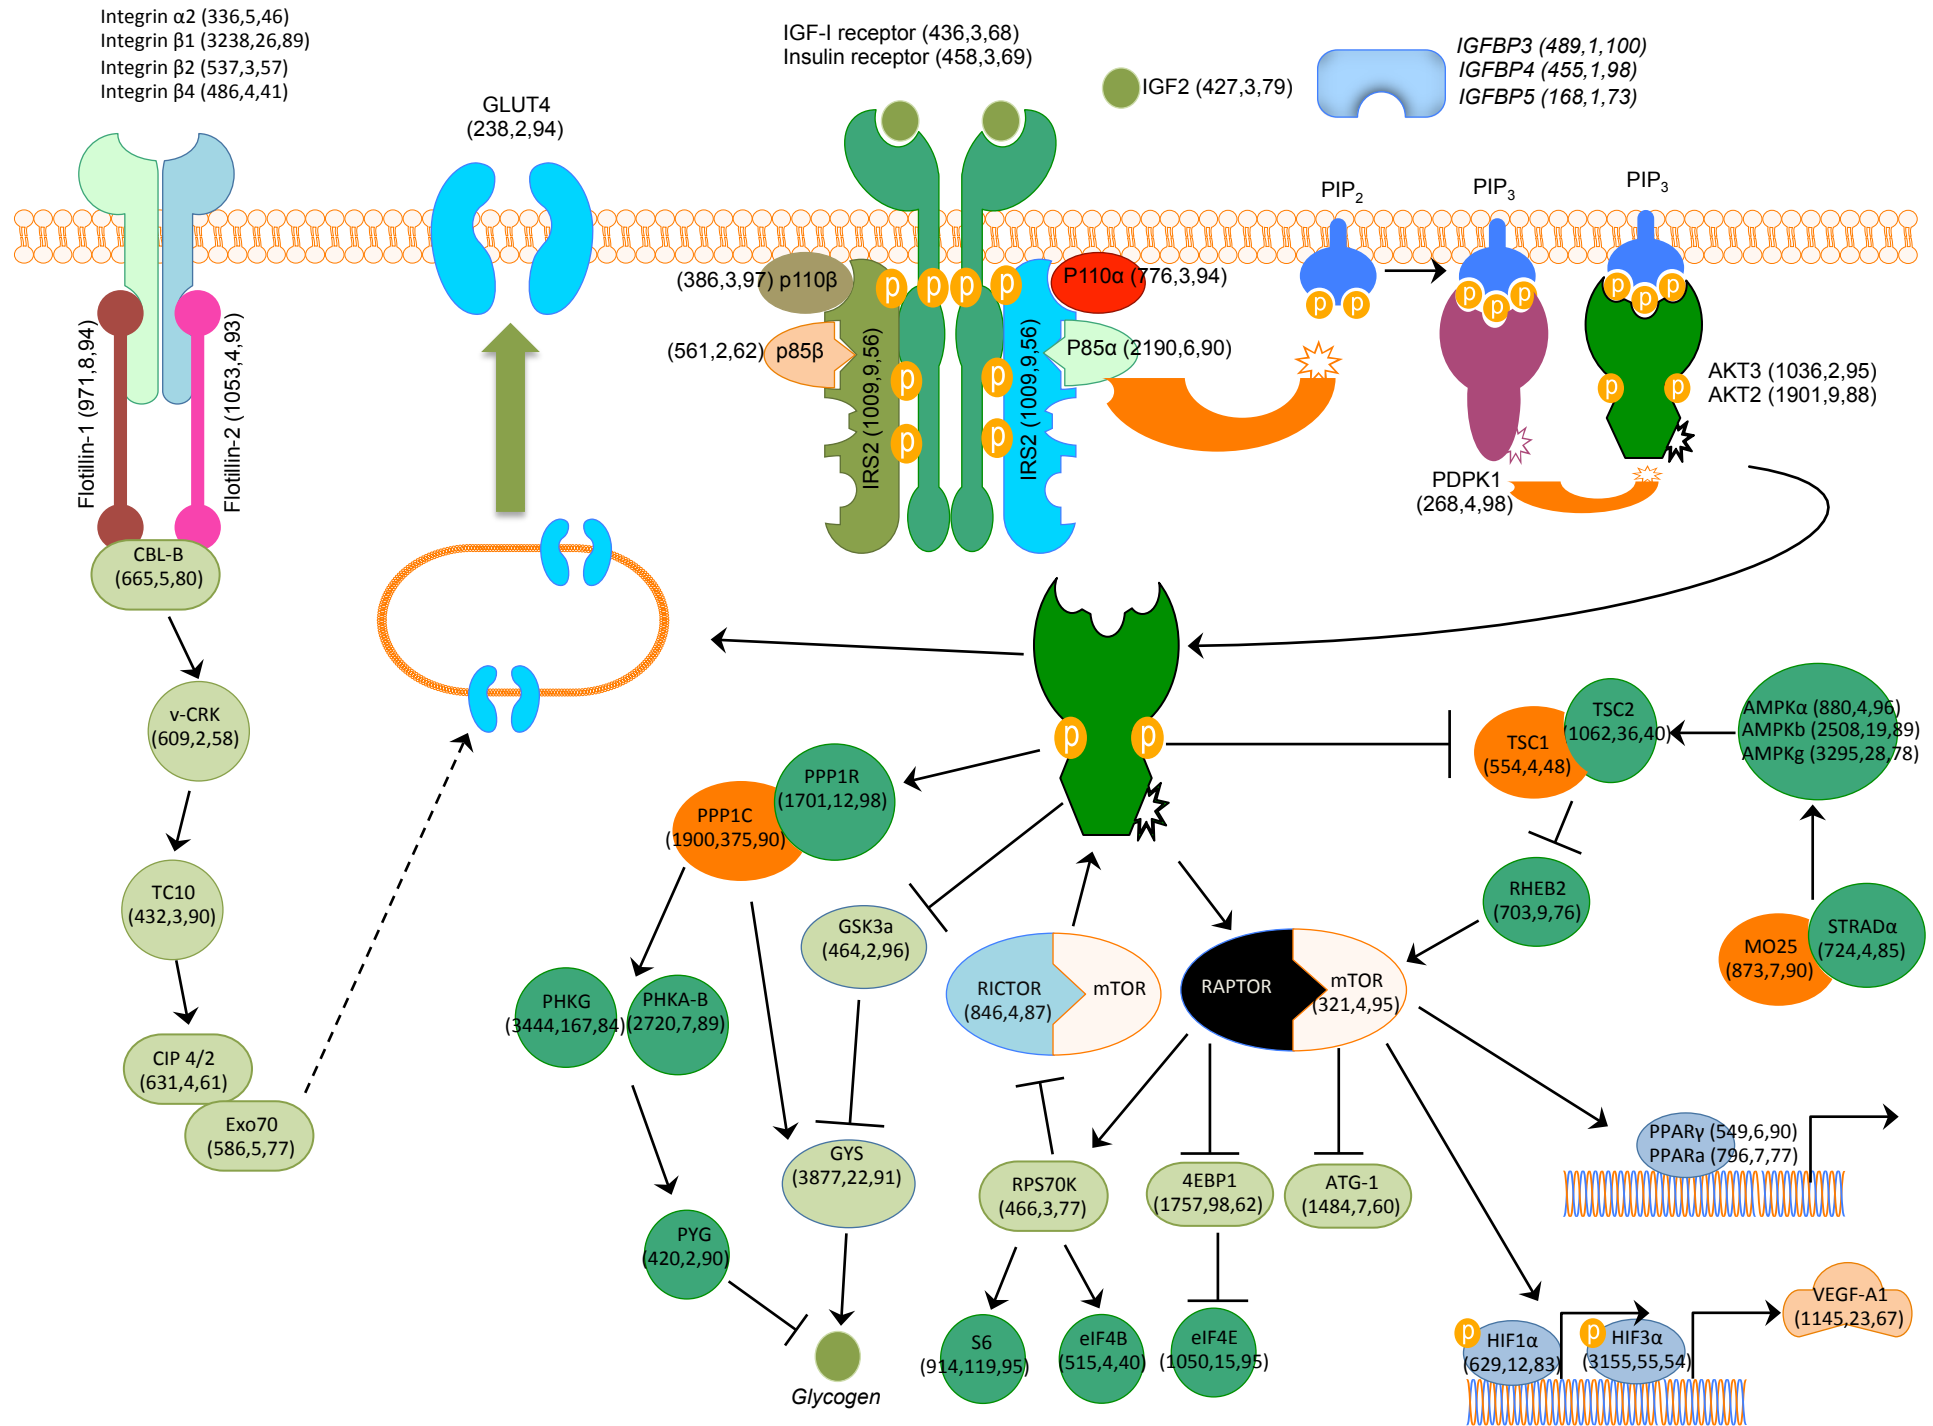

Supplement: 1471-2164-13-181-S8.pdf [file 1471-2164-13-181-S8.pdf]
